# Supplementary material
Source: HighWire-hosted journal article supplement (https://erj.ersjournals.com/content/54/3/1901363)
Supplement: inline-supplementary-material-1 [file inline-supplementary-material-1.pdf]

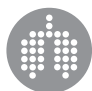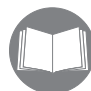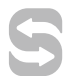

SHAREABLE PDF

# Chronic respiratory symptoms but normal lung function: substantial disease burden but little evidence to inform practice

Milo A. Puhan 

**Affiliation:** Dept of Epidemiology, Epidemiology, Biostatistics and Prevention Institute, University of Zurich, Zurich, Switzerland.

**Correspondence:** Milo A. Puhan, Dept of Epidemiology, Epidemiology, Biostatistics and Prevention Institute, University of Zurich, Switzerland, Hirschengraben 84, 8001 Zurich, Switzerland. E-mail: [miloalan.puhan@uzh.ch](mailto:miloalan.puhan@uzh.ch)

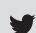

@ERSpublications

**The disease burden from chronic respiratory symptoms in individuals without airflow obstruction is substantial but evidence to inform practice is largely lacking** <http://bit.ly/2yFeVHN>

**Cite this article as:** Puhan MA. Chronic respiratory symptoms but normal lung function: substantial disease burden but little evidence to inform practice. *Eur Respir J* 2019; 54: 1901363 [<https://doi.org/10.1183/13993003.01363-2019>].

This single-page version can be shared freely online.

The treatment of symptomatic patients with chronic airway obstruction (defined by a forced expiratory volume in 1 s to forced vital capacity ratio of  $<0.7$ ) is widely established. It includes drug and non-drug treatments to slow down disease progression, reduce symptoms and reduce the risk of exacerbations [1–5]. Individuals with chronic airway obstruction but no respiratory symptoms are commonly advised to take preventive measures (e.g. smoking cessation) to slow down the decline of lung function [6]. But there is a third group of individuals that is much more difficult to deal with: individuals who have chronic respiratory symptoms but normal lung function.
